# Supplementary material for: Microneedle Array Design Determines the Induction of Protective Memory CD8+ T Cell Responses Induced by a Recombinant Live Malaria Vaccine in Mice
Source: PLOS journal article supplement (doi:10.1371/journal.pone.0022442), 2011-07-25

## Supporting Figure S2A

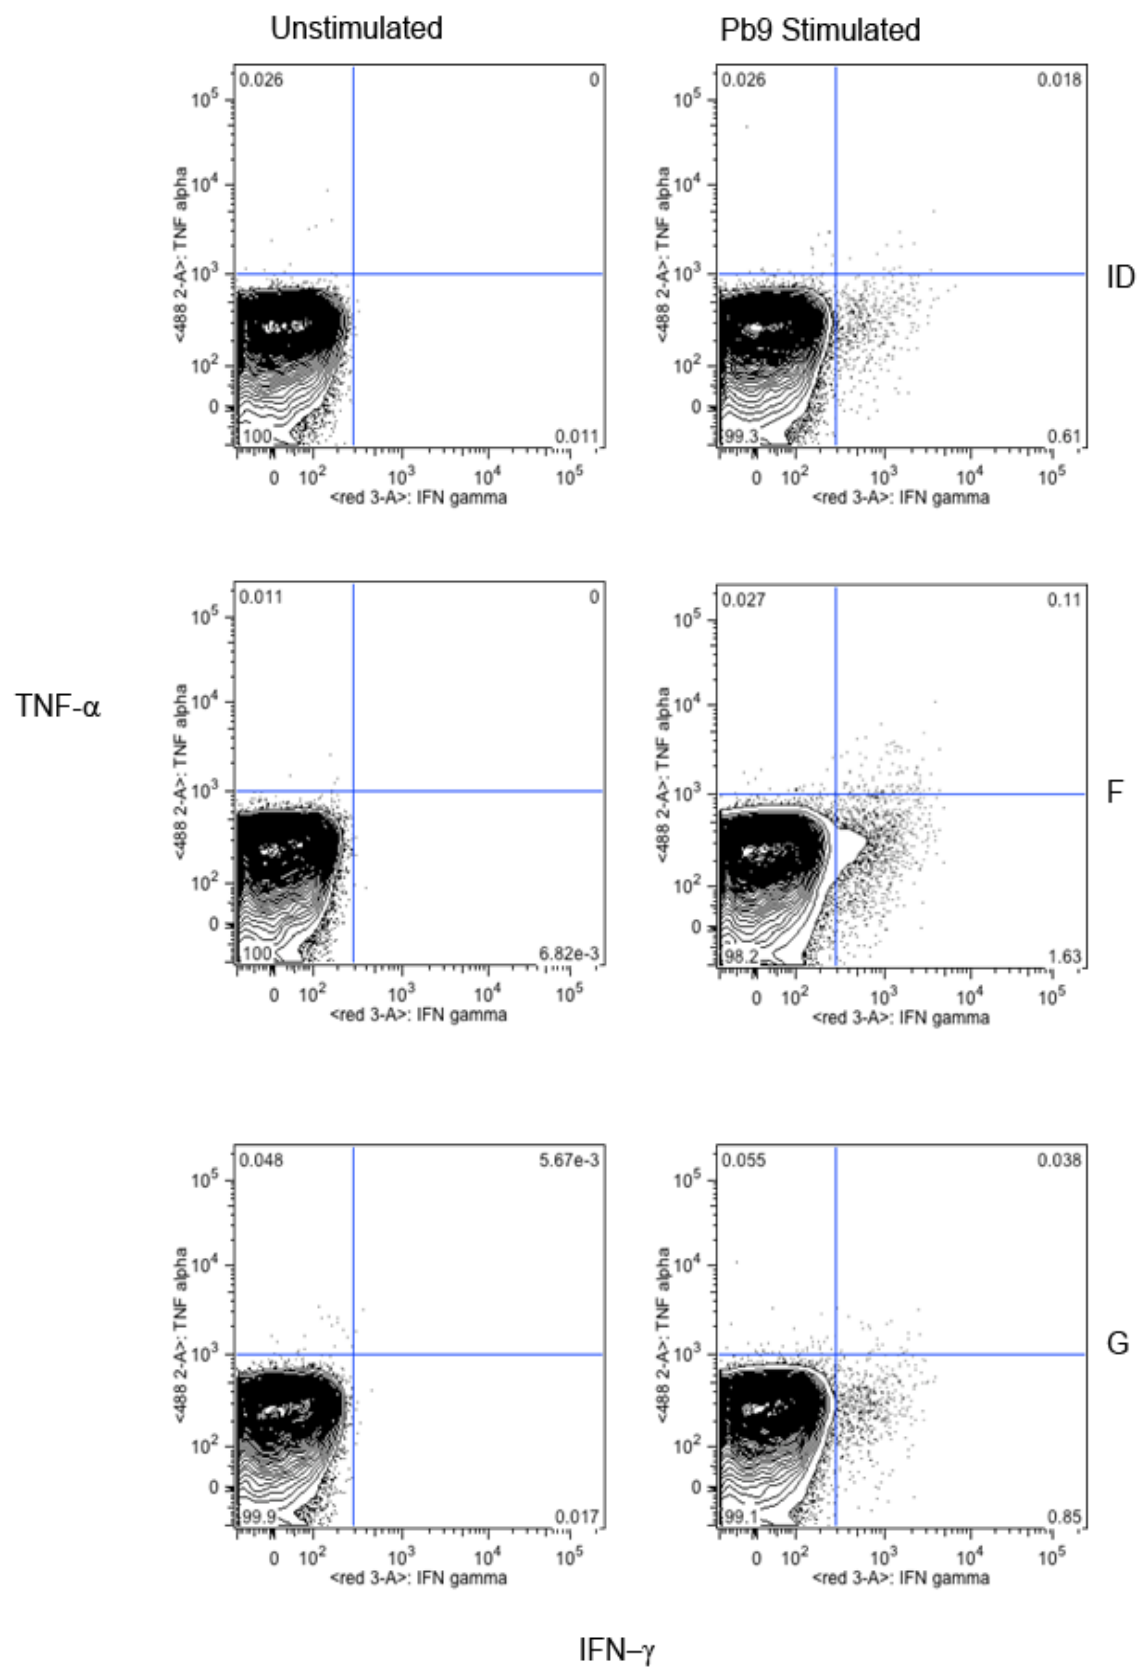

## Supporting Figure S2B

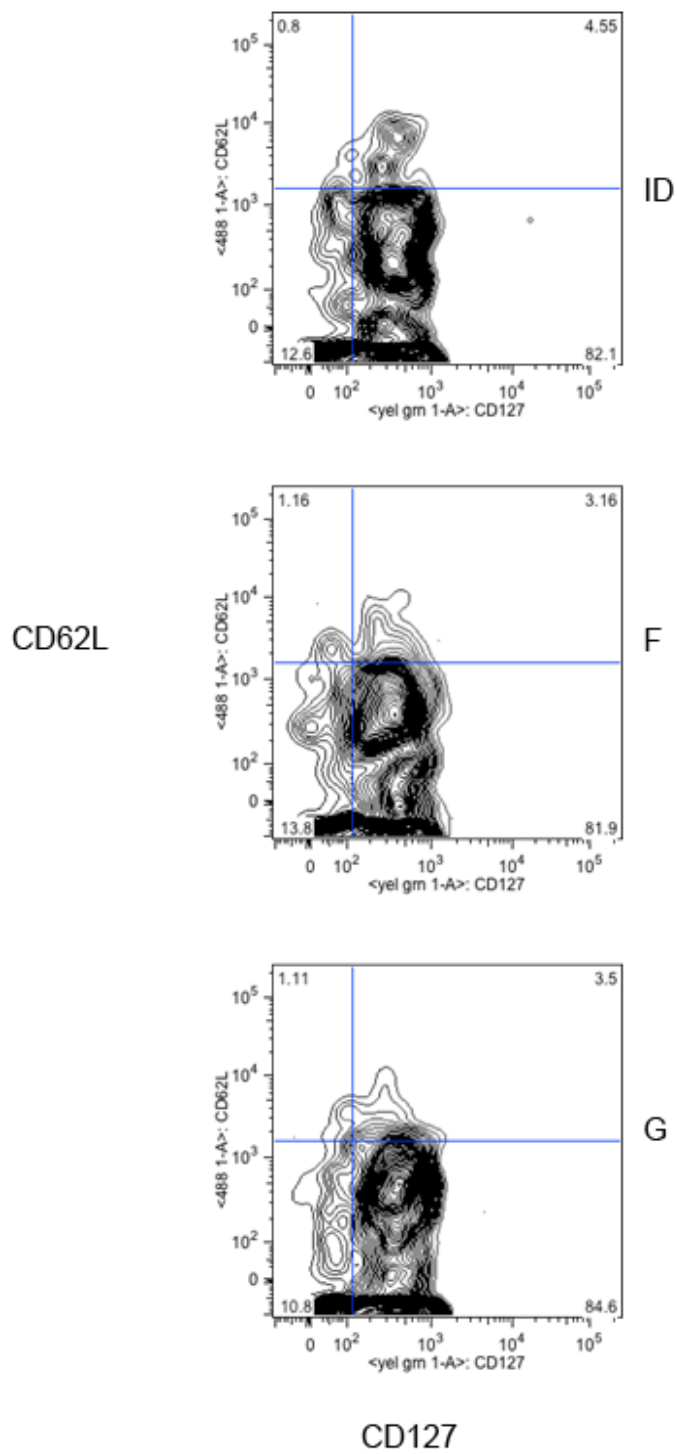

Supplement: S2 (10.1371/journal.pone.0022442.s002) [file journal.pone.0022442.s002]
